# Supplementary material
Source: publisher figshare collection journal article supplement (https://gsajournals.figshare.com/ndownloader/files/30947482)
Supplement: Supplementary file 1 [file 30947482]

id	dam	batch	tank	age	survivalCS	survivaltime	iter1	iter2	iter3	iter4	iter5	yhat_survivalCS	yhat_survivaltime
KB20201000000982091062464942	KB20140418CBF160	batch8-2020	B2	144	0	5	data1	data3	data2	data3	data1	1.153508	5.07
KB20201000000982091062464558	TT20150416D53D84	batch8-2020	B2	147	0	3	data5	data2	data5	data1	data1	1.481483	9.26
KB20201000000982091062464240	TT20150416D53D84	batch8-2020	B1	147	1	18	data1	data2	data3	data1	data1	1.753637	13.3
KB20201000000982091062466109	KB20140418CBE553	batch10-2020	B2	124	0	6	data2	data3	data5	data3	data1	1.241461	7.33
KB20201000000982091062460260	KB20140418CC38B1	batch6-2020	B2	167	0	5	data1	data3	data1	data3	data1	1.297207	6.09
KB20201000000982091062466653	KB20140418CC30EE	batch10-2020	B2	125	1	16	data1	data2	data1	data3	data1	1.714973	11.69
KB20201000000982091062460108	KB20140418CC33B1	batch8-2020	B2	142	0	2	data1	data5	data3	data1	data1	0.985885	4.15
KB20201000000982091062460423	KB20140418CBEC76	batch8-2020	B1	143	0	7	data1	data2	data2	data3	data1	1.066294	5.8
KB20201000000982091062460729	TT20150418F809FD	batch8-2020	B1	143	0	4	data5	data3	data4	data2	data1	1.083995	5.16
KB20201000000982091062466009	KB20140418C81B1F	batch10-2020	B2	125	1	18	data1	data3	data3	data3	data1	1.685017	12.33
KB20201000000982091062461942	KB20140418CBBF39	batch6-2020	B2	167	1	8	data3	data1	data2	data5	data1	1.794574	8.15
KB20201000000982091062463485	KB20140418CBF160	batch8-2020	B1	146	0	6	data5	data1	data2	data5	data1	1.168564	5.36
KB20201000000982091062460186	KB20140418CC38B1	batch6-2020	B2	167	1	9	data4	data1	data1	data3	data1	1.569077	7.17
KB20201000000982091062466838	HOANG0416D8E452	batch9-2020	B2	137	0	4	data1	data5	data4	data4	data1	1.032554	5.14
KB20201000000982091062461967	KB20140418CBBF39	batch6-2020	B2	167	1	9	data3	data1	data3	data5	data1	1.684008	8.05
KB20201000000982091062461870	KB20140418CBBF39	batch6-2020	B2	167	0	3	data1	data3	data4	data4	data1	1.368571	4.96
KB20201000000982091062460411	KB20140418CBEC76	batch8-2020	B1	143	0	5	data3	data3	data2	data2	data1	1.053944	4.9
KB20201000000982091062463669	KB20140417BC10FB	batch10-2020	B1	126	0	6	data5	data3	data4	data2	data1	1.198507	6.52
KB20201000000982091062460223	KB20140418CC38B1	batch6-2020	B2	167	0	4	data1	data2	data3	data4	data1	1.285707	5.9
KB20201000000982091062460459	KB20140418CC0EFF	batch8-2020	B2	143	0	3	data2	data5	data4	data4	data1	1.045598	4.58
KB20201000000982091062464989	KB20140418CC649D	batch8-2020	B2	144	0	7	data4	data1	data2	data1	data1	1.11049	5.94
KB20201000000968000010979413	KB20140418CC3691	batch10-2020	B1	127	0	6	data5	data2	data2	data4	data1	1.489839	8.73
KB20201000000982091062464934	KB20140418CBF160	batch8-2020	B1	144	0	5	data2	data5	data1	data2	data1	1.36637	6.26
KB20201000000982091062465056	KB20140418CC262B	batch8-2020	B2	144	0	2	data1	data5	data3	data2	data1	1.001263	4.15
KB20201000000982091062463264	KB20140418C80A5C	batch8-2020	B2	144	0	3	data1	data1	data1	data1	data1	1.268851	4.99
KB20201000000982091062460362	KB20140418CBD457	batch8-2020	B1	143	1	9	data3	data1	data5	data2	data1	1.737143	8.56
KB20201000000982091062461463	KB20140418CBD0E4	batch6-2020	B2	167	0	5	data1	data3	data2	data2	data1	1.185247	5.61
KB20201000000982091062460233	KB20140418CC38B1	batch6-2020	B2	167	0	6	data3	data1	data1	data5	data1	1.221004	5.39
KB20201000000982091062463997	KB20140418CBE9A0	batch10-2020	B1	126	1	9	data5	data1	data2	data3	data1	1.759269	8.57
KB20201000000982091062463527	KB20140418CC4920	batch8-2020	B2	146	0	3	data3	data2	data4	data2	data1	1.016312	3.75
KB20201000000982091062464370	KB20140418CBC22D	batch8-2020	B1	147	1	11	data2	data4	data3	data4	data1	1.724709	10.62
KB20201000000982091062461067	KB20140418CC649D	batch8-2020	B1	146	1	10	data5	data1	data1	data5	data1	1.673322	10.4
KB20201000000982091062466950	KB20140418CBDD50	batch9-2020	B1	137	0	2	data4	data5	data1	data1	data1	1.069696	5.12
KB20201000000982091062460492	KB20140418CBE76D	batch8-2020	B1	146	1	8	data3	data2	data4	data1	data1	1.891369	8.44
KB20201000000982091062464904	KB20140418CBF160	batch8-2020	B2	144	0	2	data5	data4	data5	data4	data1	1.115405	4.81
KB20201000000982091062464810	KB20140418CC262B	batch8-2020	B1	144	0	8	data1	data3	data3	data3	data1	1.038655	6.4
KB20201000000982091062460158	KB20140418CC33B1	batch8-2020	B1	142	0	8	data5	data2	data3	data1	data1	1.07095	5.32
KB20201000000982091062460494	KB20140418CBE76D	batch8-2020	B1	146	1	8	data4	data4	data5	data3	data1	1.700201	8.27
KB20201000000982091062460413	KB20140418CBEC76	batch8-2020	B2	143	0	2	data1	data5	data1	data3	data1	0.957837	3.36
KB20201000000968000010978701	KB20140418C81B1F	batch10-2020	B1	127	1	16	data2	data5	data1	data1	data1	1.758032	12.24
KB20201000000982091062464602	KB20140418CBE76D	batch8-2020	B1	147	0	7	data2	data2	data1	data4	data1	1.380173	8.35
KB20201000000982091062461016	KB20140418CC649D	batch8-2020	B2	146	1	9	data4	data5	data3	data3	data1	1.501764	7.48
KB20201000000982091062466669	KB20140418CC30EE	batch10-2020	B2	125	1	12	data4	data2	data2	data5	data1	1.737741	10.18
KB20201000000982091062463410	KB20140418CBF160	batch8-2020	B2	146	0	3	data3	data4	data5	data3	data1	1.157842	4.48
KB20201000000982091062460516	KB20140418CBE76D	batch8-2020	B1	146	1	8	data1	data3	data4	data5	data1	1.77333	8.57
KB20201000000982091062465029	KB20140418CC262B	batch8-2020	B1	144	0	8	data2	data4	data1	data5	data1	1.059964	6.34
KB20201000000982091062464531	KB20140418CC33B1	batch8-2020	B2	147	0	6	data3	data5	data1	data2	data1	1.094678	6.25
KB20201000000982091062464043	KB20140417BC10FB	batch10-2020	B2	126	0	2	data5	data4	data1	data1	data1	1.053664	4.36
KB20201000000982091062460330	KB20140418CBD457	batch8-2020	B2	143	0	5	data4	data3	data3	data5	data1	1.296217	5.55
KB20201000000982091062466149	KB20140418CBE553	batch10-2020	B2	124	1	18	data5	data1	data4	data5	data1	1.669557	13.33
KB20201000000982091062464702	KB20140418CC4920	batch8-2020	B2	147	0	3	data2	data2	data3	data3	data1	0.993164	4.55
KB20201000000968000010979288	KB20140418CC3691	batch10-2020	B1	127	0	6	data4	data1	data3	data1	data1	1.358999	8.16
KB20201000000968000010980746	KB20140418CBDD50	batch9-2020	B1	137	0	3	data4	data1	data5	data3	data1	1.112421	4.91
KB20201000000982091062467020	KB20140418CC4D91	batch8-2020	B1	149	0	3	data3	data1	data5	data5	data1	1.12801	5.57
KB20201000000982091062460388	KB20140418CBEC76	batch8-2020	B1	143	0	6	data1	data5	data4	data2	data1	1.066294	5.5
KB20201000000982091062464492	KB20140418CC33B1	batch8-2020	B1	147	0	8	data1	data1	data5	data3	data1	1.272786	7.35
KB20201000000982091062463870	KB20140418CBE9A0	batch10-2020	B1	126	1	8	data5	data1	data5	data5	data1	1.789032	7.97
KB20201000000982091062460176	KB20140418CC33B1	batch8-2020	B2	142	0	4	data2	data5	data5	data1	data1	1.060924	4.42
KB20201000000982091062464774	KB20140418CC4920	batch8-2020	B2	147	0	5	data2	data1	data2	data2	data1	1.157897	5.67
KB20201000000982091062463650	KB20140417BC10FB	batch10-2020	B1	126	0	8	data4	data2	data1	data5	data1	1.285877	7.11
KB20201000000982091062463595	TT201504179BD8C9	batch10-2020	B2	126	0	2	data4	data1	data3	data3	data1	1.096919	5.05
KB20201000000982091062463998	KB20140418CBE9A0	batch10-2020	B1	126	1	8	data4	data3	data4	data4	data1	1.821176	7.8
KB20201000000982091062463679	KB20140417BC10FB	batch10-2020	B1	126	0	5	data1	data2	data2	data5	data1	1.186417	5.98
KB20201000000982091062463287	KB20140418C80A5C	batch8-2020	B2	144	0	8	data2	data3	data2	data3	data1	1.32094	7.14
KB20201000000982091062465070	KB20140418CC262B	batch8-2020	B2	144	0	5	data4	data3	data3	data2	data1	1.015132	4.59
KB20201000000982091062464968	KB20140418CC649D	batch8-2020	B2	144	1	8	data4	data1	data4	data4	data1	1.617884	8.48
KB20201000000982091062463257	KB20140418C80A5C	batch8-2020	B2	144	1	9	data5	data3	data3	data5	data1	1.613341	7.61
KB20201000000982091062460903	KB20140418CC4D91	batch8-2020	B1	144	0	2	data2	data5	data5	data4	data1	1.004658	2.81
KB20201000000982091062460365	KB20140418CBD457	batch8-2020	B2	143	0	5	data1	data3	data2	data1	data1	1.169484	4.89
KB20201000000982091062463640	TT201504179BD8C9	batch10-2020	B1	126	0	4	data2	data4	data1	data4	data1	1.079535	6.2
KB20201000000982091062464559	KB20140418CC33B1	batch8-2020	B1	147	0	5	data5	data1	data5	data3	data1	1.258512	6.99
KB20201000000982091062461813	KB20140418CBBF39	batch6-2020	B2	167	1	8	data1	data4	data3	data5	data1	1.608187	7.09
KB20201000000982091062465047	KB20140418CC262B	batch8-2020	B2	144	0	2	data4	data4	data5	data1	data1	1.086801	4.58
KB20201000000982091062464335	KB20140418CBC22D	batch8-2020	B1	147	1	8	data5	data3	data5	data4	data1	1.679176	8.47
KB20201000000982091062463557	KB20140418CC5321	batch8-2020	B2	146	0	2	data3	data1	data5	data3	data1	1.078894	3.94
KB20201000000982091062463552	KB20140418CC4920	batch8-2020	B2	146	0	3	data5	data4	data1	data4	data1	1.024678	4.24
KB20201000000982091062461049	KB20140418CC649D	batch8-2020	B1	146	1	16	data4	data3	data2	data5	data1	1.7142	11.21
KB20201000000982091062463480	KB20140418CBF160	batch8-2020	B1	146	0	5	data4	data1	data5	data3	data1	1.144109	5.47
KB20201000000982091062464985	KB20140418CC649D	batch8-2020	B2	144	0	8	data1	data3	data5	data4	data1	1.34414	8.3
KB20201000000982091062466118	KB20140418CBE553	batch10-2020	B2	124	1	17	data3	data4	data2	data4	data1	1.720181	13.94
KB20201000000982091062465027	KB20140418CC262B	batch8-2020	B1	144	0	2	data2	data3	data3	data3	data1	1.07227	4.05
KB20201000000968000010981458	KB20140418CBDD69	batch9-2020	B2	138	0	3	data3	data3	data1	data2	data1	0.990063	4.58
KB20201000000982091062464954	KB20140418CBF160	batch8-2020	B1	144	1	8	data3	data3	data1	data3	data1	1.478481	7.14
KB20201000000982091062460392	KB20140418CC0EFF	batch8-2020	B2	143	0	2	data3	data5	data5	data3	data1	1.032048	4.51
KB20201000000982091062462021	KB20140418CC33B1	batch8-2020	B1	142	0	4	data4	data5	data2	data4	data1	1.146791	5.16
KB20201000000982091062460263	KB20140418CC38B1	batch6-2020	B2	167	1	8	data5	data4	data2	data4	data1	1.461809	5.72
KB20201000000982091062463305	KB20140418CC4920	batch8-2020	B1	146	0	2	data2	data5	data3	data1	data1	1.070891	3.34
KB20201000000982091062461909	KB20140418CBBF39	batch6-2020	B2	167	1	9	data1	data2	data4	data1	data1	1.63898	7.11
KB20201000000982091062464680	KB20140418CBE76D	batch8-2020	B1	147	0	4	data5	data3	data5	data4	data1	1.356288	7.44
KB20201000000982091062463666	TT201504179BD8C9	batch10-2020	B2	126	0	7	data5	data3	data2	data2	data1	1.109951	6.8
KB20201000000968000010981463	KB20140418CBDD69	batch9-2020	B2	138	0	8	data3	data1	data1	data1	data1	1.133987	6.18
KB20201000000982091062460461	KB20140418CBEC76	batch8-2020	B1	143	0	8	data2	data4	data3	data1	data1	1.053244	5.9
KB20201000000982091062464963	KB20140418CC649D	batch8-2020	B2	144	0	3	data2	data3	data1	data2	data1	1.214483	5.65
KB20201000000982091062461819	KB20140418CBBF39	batch6-2020	B1	167	0	4	data4	data3	data5	data3	data1	1.384688	5.87
KB20201000000982091062461053	KB20140418CC4D91	batch8-2020	B1	144	0	4	data1	data5	data2	data5	data1	1.014742	4.49
KB20201000000982091062463399	KB20140418CBF160	batch8-2020	B1	146	0	4	data1	data5	data5	data4	data1	1.065749	4.23
KB20201000000982091062464801	KB20140418CC262B	batch8-2020	B2	144	0	5	data5	data1	data4	data4	data1	1.000136	5.51
KB20201000000982091062461032	KB20140418CC649D	batch8-2020	B1	146	1	9	data2	data5	data2	data2	data1	1.734509	9.93
KB20201000000982091062466887	KB20140418C843C2	batch9-2020	B2	137	0	8	data5	data3	data2	data5	data2	1.469684	7.26
KB20201000000982091062463601	KB20140417BC10FB	batch10-2020	B1	126	1	9	data1	data1	data1	data4	data2	1.563258	7.57
KB20201000000982091062461905	KB20140418CBBF39	batch6-2020	B2	167	1	8	data1	data2	data1	data4	data2	1.617517	6.74
KB20201000000982091062462540	KB20140418CBE76D	batch8-2020	B2	147	1	16	data4	data1	data3	data4	data2	1.564018	11.26
KB20201000000982091062464577	KB20140418CC33B1	batch8-2020	B2	147	0	7	data1	data3	data2	data4	data2	1.147416	7.07
KB20201000000982091062466850	KB20140418C843C2	batch9-2020	B2	137	1	8	data2	data1	data2	data2	data2	1.653605	7.39
KB20201000000982091062464726	KB20140418CC4920	batch8-2020	B2	147	0	3	data1	data2	data1	data2	data2	1.003657	4.35
KB20201000000982091062463487	KB20140418CBF160	batch8-2020	B2	146	0	5	data2	data4	data3	data5	data2	1.114903	5.22
KB20201000000982091062466990	KB20140418CBDD50	batch9-2020	B2	137	0	3	data4	data4	data1	data1	data2	1.007032	4.41
KB20201000000982091062466641	KB20140418CC30EE	batch10-2020	B1	125	1	10	data2	data3	data4	data1	data2	1.678415	8.95
KB20201000000982091062460953	KB20140418CC4D91	batch8-2020	B1	144	0	2	data4	data4	data3	data4	data2	1.053979	3.8
KB20201000000982091062463627	KB20140417BC10FB	batch10-2020	B1	126	1	9	data4	data3	data4	data4	data2	1.603676	7.71
KB20201000000982091062464352	KB20140418CBC22D	batch8-2020	B1	147	1	18	data5	data2	data1	data3	data2	1.665	12.48
KB20201000000982091062464914	KB20140418CC649D	batch8-2020	B2	144	1	8	data4	data2	data3	data1	data2	1.529108	7.89
KB20201000000982091062461474	KB20140418CBD0E4	batch6-2020	B1	167	1	9	data3	data5	data3	data3	data2	1.512661	6.92
KB20201000000982091062461432	KB20140418CBD0E4	batch6-2020	B1	167	0	8	data3	data2	data1	data2	data2	1.166292	6.45
KB20201000000982091062465008	KB20140418CC262B	batch8-2020	B1	144	0	8	data1	data4	data1	data3	data2	1.01734	4.98
KB20201000000968000010979259	KB20140418C81B1F	batch10-2020	B1	127	1	17	data4	data4	data2	data5	data2	1.736335	12.84
KB20201000000982091062464885	KB20140418CC262B	batch8-2020	B1	144	0	7	data2	data5	data2	data4	data2	1.061661	5.99
KB20201000000982091062460736	TT20150418F809FD	batch8-2020	B1	143	0	5	data2	data1	data4	data1	data2	1.012236	4.7
KB20201000000982091062460328	KB20140418CBD457	batch8-2020	B2	143	0	2	data3	data4	data5	data1	data2	1.321333	4.93
KB20201000000968000010980892	KB20140418CBDD69	batch9-2020	B2	138	0	7	data5	data3	data2	data5	data2	1.029848	6.15
KB20201000000982091062465036	KB20140418CC262B	batch8-2020	B1	144	0	5	data2	data5	data5	data1	data2	1.038908	5.14
KB20201000000982091062466045	KB20140418C81B1F	batch10-2020	B1	125	1	8	data4	data1	data1	data3	data2	1.81983	10.5
KB20201000000982091062466845	HOANG0416D8E452	batch9-2020	B2	137	0	8	data5	data2	data1	data2	data2	1.02068	6.05
KB20201000000982091062461959	KB20140418CBBF39	batch6-2020	B2	167	1	8	data3	data5	data3	data1	data2	1.778273	7.15
KB20201000000982091062460122	KB20140418CC33B1	batch8-2020	B1	142	0	8	data2	data1	data3	data3	data2	0.985372	5.4
KB20201000000982091062464048	KB20140417BC10FB	batch10-2020	B2	126	0	8	data5	data5	data1	data1	data2	1.171073	7.59
KB20201000000982091062464649	KB20140418CBE76D	batch8-2020	B2	147	0	5	data2	data2	data3	data2	data2	1.394412	8.86
KB20201000000982091062463256	KB20140418C80A5C	batch8-2020	B2	144	1	12	data5	data5	data4	data3	data2	1.573807	8.21
KB20201000000982091062463230	KB20140418C80A5C	batch8-2020	B2	144	0	4	data5	data2	data3	data4	data2	1.361173	5.8
KB20201000000982091062466847	HOANG0416D8E452	batch9-2020	B2	137	0	5	data1	data1	data2	data1	data2	1.006905	4.94
KB20201000000982091062460359	KB20140418CBD457	batch8-2020	B1	143	0	4	data1	data1	data4	data1	data2	1.327727	6.06
KB20201000000982091062460703	TT20150418F809FD	batch8-2020	B1	143	0	7	data2	data1	data4	data5	data2	1.019219	6.37
KB20201000000982091062466650	KB20140418CC30EE	batch10-2020	B1	125	1	9	data5	data4	data5	data4	data2	1.6979	8.26
KB20201000000982091062463511	KB20140418CC4920	batch8-2020	B2	146	0	3	data1	data2	data1	data4	data2	0.983312	3.12
KB20201000000982091062460818	KB20140418CBE76D	batch8-2020	B1	146	0	3	data3	data2	data1	data3	data2	1.423355	5.92
KB20201000000982091062467011	KB20140418CC4D91	batch8-2020	B2	149	0	5	data4	data1	data3	data4	data2	1.065461	5.83
KB20201000000982091062464756	KB20140418CC4920	batch8-2020	B1	147	0	4	data4	data5	data5	data1	data2	1.133483	5.82
KB20201000000982091062466849	KB20140418C843C2	batch9-2020	B2	137	1	8	data4	data3	data2	data4	data2	1.66425	7.21
KB20201000000982091062460760	TT20150418F809FD	batch8-2020	B1	143	0	8	data4	data4	data2	data2	data2	1.011965	6.52
KB20201000000982091062467007	KB20140418CC4D91	batch8-2020	B1	149	0	6	data5	data4	data4	data3	data2	1.225617	6.31
KB20201000000982091062460381	KB20140418CBD457	batch8-2020	B2	143	1	9	data2	data2	data2	data5	data2	1.529801	6.7
KB20201000000982091062460557	KB20140418CBE76D	batch8-2020	B1	146	1	8	data1	data1	data5	data1	data2	1.750862	7.82
KB20201000000982091062463659	TT201504179BD8C9	batch10-2020	B2	126	0	8	data4	data4	data5	data4	data2	1.105115	6.82
KB20201000000968000010978735	KB20140418C81B1F	batch10-2020	B1	127	1	18	data2	data3	data2	data2	data2	1.792842	13.1
KB20201000000982091062464318	KB20140418CBC22D	batch8-2020	B2	147	0	3	data2	data3	data2	data5	data2	1.361928	7.59
KB20201000000982091062463689	KB20140417BC10FB	batch10-2020	B1	126	0	6	data3	data5	data4	data5	data2	1.145414	6.68
KB20201000000982091062464817	KB20140418CC262B	batch8-2020	B2	144	0	5	data2	data5	data3	data3	data2	0.920633	5.13
KB20201000000982091062464835	KB20140418CC262B	batch8-2020	B1	144	0	3	data2	data4	data1	data3	data2	1.0713	5.17
KB20201000000982091062462025	KB20140418CC33B1	batch8-2020	B1	142	0	3	data5	data5	data2	data1	data2	1.072837	3.91
KB20201000000982091062464943	KB20140418CBF160	batch8-2020	B1	144	1	8	data5	data5	data1	data1	data2	1.549106	6.64
KB20201000000982091062461835	KB20140418CC0F54	batch6-2020	B2	167	0	5	data4	data5	data3	data1	data2	1.42942	6.92
KB20201000000968000010978958	KB20140418CC3691	batch10-2020	B1	127	0	4	data4	data5	data2	data5	data2	1.462628	8.72
KB20201000000982091062464023	KB20140417BC10FB	batch10-2020	B1	126	0	6	data2	data5	data5	data1	data2	1.265841	6.9
KB20201000000982091062460267	KB20140418CC38B1	batch6-2020	B1	167	0	6	data3	data1	data1	data4	data2	1.441003	7.19
KB20201000000982091062464717	KB20140418CC4920	batch8-2020	B2	147	0	4	data4	data4	data1	data3	data2	1.108277	5.21
KB20201000000982091062460097	KB20140418CC33B1	batch8-2020	B2	142	0	2	data3	data1	data4	data2	data2	0.998176	3.87
KB20201000000968000010981486	KB20140418CBDD69	batch9-2020	B1	138	0	7	data2	data5	data1	data2	data2	1.109602	6.03
KB20201000000982091062460976	KB20140418CC4D91	batch8-2020	B2	144	0	5	data1	data5	data1	data2	data2	0.945613	4.54
KB20201000000982091062461065	KB20140418CC649D	batch8-2020	B1	146	1	12	data4	data2	data1	data4	data2	1.661816	9.43
KB20201000000982091062466659	KB20140418CC30EE	batch10-2020	B2	125	0	5	data3	data2	data2	data3	data2	1.217753	6.24
KB20201000000968000010979296	KB20140418C81B1F	batch10-2020	B1	127	1	18	data3	data1	data5	data3	data2	1.797062	13.02
KB20201000000982091062466176	KB20140418CBE553	batch10-2020	B1	124	0	6	data5	data3	data5	data4	data2	1.397872	8.89
KB20201000000982091062464587	TT20150416D53D84	batch8-2020	B2	147	1	18	data1	data5	data1	data2	data2	1.643199	12.42
KB20201000000982091062460933	KB20140418CC4D91	batch8-2020	B1	144	0	8	data4	data5	data3	data4	data2	0.875199	4.78
KB20201000000982091062461980	KB20140418CBBF39	batch6-2020	B2	167	0	7	data2	data2	data3	data2	data2	1.489433	7.07
KB20201000000968000010979146	KB20140418CC3691	batch10-2020	B1	127	1	12	data2	data4	data5	data1	data2	1.746026	10.21
KB20201000000982091062461986	KB20140418CBBF39	batch6-2020	B2	167	0	3	data3	data5	data5	data2	data2	1.58284	7.18
KB20201000000982091062464526	KB20140418CC33B1	batch8-2020	B2	147	0	3	data4	data2	data5	data2	data2	1.088879	4.42
KB20201000000968000010981037	KB20140418CBDD69	batch9-2020	B1	138	0	4	data2	data2	data3	data2	data2	1.083797	5.04
KB20201000000982091062464873	KB20140418CC262B	batch8-2020	B2	144	0	5	data3	data2	data4	data5	data2	1.009638	5.39
KB20201000000982091062464651	KB20140418CBE76D	batch8-2020	B1	147	0	4	data3	data4	data1	data1	data2	1.295499	7.32
KB20201000000982091062464972	KB20140418CBF160	batch8-2020	B1	144	0	5	data1	data5	data4	data1	data2	1.27408	6.27
KB20201000000982091062461418	KB20140418CC1429	batch6-2020	B1	167	1	8	data5	data4	data3	data5	data2	1.834736	7.75
KB20201000000982091062464700	KB20140418CC4920	batch8-2020	B1	147	0	6	data2	data2	data5	data1	data2	1.112441	5.47
KB20201000000982091062461467	KB20140418CC1429	batch6-2020	B1	167	1	9	data4	data4	data2	data4	data2	1.834736	8.05
KB20201000000968000010981610	HOANG0416D8E452	batch9-2020	B1	137	0	5	data1	data2	data4	data2	data2	0.982066	4.49
KB20201000000982091062464015	KB20140418CBE9A0	batch10-2020	B1	126	1	8	data4	data3	data4	data1	data2	1.817231	7.96
KB20201000000982091062463828	KB20140418CBE9A0	batch10-2020	B2	126	0	4	data3	data4	data2	data1	data2	1.541856	6.64
KB20201000000982091062463533	KB20140418CC5321	batch8-2020	B2	146	0	5	data2	data1	data1	data3	data2	1.018308	4.55
KB20201000000982091062464987	KB20140418CC649D	batch8-2020	B2	144	0	8	data5	data3	data4	data4	data2	1.311366	8.28
KB20201000000982091062466645	KB20140418CC30EE	batch10-2020	B1	125	0	2	data3	data4	data5	data1	data2	1.467917	6.81
KB20201000000982091062460125	KB20140418CC33B1	batch8-2020	B2	142	0	2	data2	data4	data5	data3	data2	0.991664	3.85
KB20201000000982091062466157	KB20140418CBE553	batch10-2020	B2	124	1	17	data2	data3	data5	data5	data2	1.733184	13.65
KB20201000000982091062466940	KB20140418CBDD50	batch9-2020	B2	137	0	8	data1	data1	data4	data2	data2	1.05687	6.23
KB20201000000982091062461469	KB20140418CC1429	batch6-2020	B2	167	1	8	data3	data5	data5	data5	data2	1.779003	7.56
KB20201000000982091062463629	TT201504179BD8C9	batch10-2020	B2	126	0	8	data1	data4	data5	data4	data2	1.096844	7.67
KB20201000000982091062464504	TT20150416D53D84	batch8-2020	B2	147	0	4	data1	data5	data1	data5	data2	1.361661	8.49
KB20201000000982091062464757	KB20140418CC4920	batch8-2020	B2	147	0	8	data5	data2	data2	data5	data2	0.986686	5.2
KB20201000000968000010981399	HOANG0416D8E452	batch9-2020	B2	137	0	6	data2	data2	data4	data3	data2	0.978023	5.04
KB20201000000982091062463687	TT201504179BD8C9	batch10-2020	B2	126	0	8	data1	data5	data5	data5	data2	1.097108	6.67
KB20201000000982091062464266	TT20150416D53D84	batch8-2020	B1	147	1	17	data1	data2	data2	data4	data2	1.710034	11.95
KB20201000000982091062461450	KB20140418CBD0E4	batch6-2020	B2	167	0	3	data2	data2	data3	data2	data2	1.157686	4.72
KB20201000000982091062460383	KB20140418CBD457	batch8-2020	B2	143	1	9	data5	data2	data1	data3	data2	1.568888	7.07
KB20201000000982091062460094	KB20140418CC33B1	batch8-2020	B2	142	0	2	data3	data4	data1	data2	data2	0.941561	3.19
KB20201000000982091062464030	KB20140418CBE9A0	batch10-2020	B1	126	1	8	data1	data5	data5	data1	data2	1.839208	8.34
KB20201000000982091062461954	KB20140418CBBF39	batch6-2020	B2	167	0	3	data5	data4	data2	data4	data2	1.372912	5.32
KB20201000000982091062460753	TT20150418F809FD	batch8-2020	B1	143	0	4	data2	data2	data5	data5	data3	1.002972	4.44
KB20201000000982091062461925	KB20140418CBBF39	batch6-2020	B2	167	1	8	data3	data3	data1	data5	data3	1.706643	6.96
KB20201000000982091062461944	KB20140418CBBF39	batch6-2020	B2	167	1	8	data3	data4	data2	data4	data3	1.670641	7.44
KB20201000000982091062464545	TT20150416D53D84	batch8-2020	B2	147	1	18	data5	data1	data2	data2	data3	1.632301	11.55
KB20201000000982091062466130	KB20140418CC3691	batch10-2020	B2	124	1	19	data4	data5	data2	data2	data3	1.652813	10.95
KB20201000000982091062460394	KB20140418CC0EFF	batch8-2020	B1	143	0	4	data1	data2	data4	data1	data3	1.016589	5.43
KB20201000000982091062461074	KB20140418CBEC76	batch8-2020	B2	144	0	2	data2	data1	data2	data3	data3	1.070418	3.77
KB20201000000982091062464049	KB20140418CBE9A0	batch10-2020	B1	126	0	7	data2	data5	data2	data4	data3	1.550333	8.28
KB20201000000982091062464314	KB20140418CBC22D	batch8-2020	B2	147	1	17	data4	data1	data1	data5	data3	1.659245	12.01
KB20201000000968000010979568	KB20140418CC3691	batch10-2020	B2	127	1	12	data2	data3	data4	data1	data3	1.595442	9.13
KB20201000000982091062461015	KB20140418CC649D	batch8-2020	B1	146	1	9	data5	data4	data3	data5	data3	1.742389	10.05
KB20201000000982091062464299	KB20140418CBC22D	batch8-2020	B2	147	0	6	data3	data5	data1	data5	data3	1.442876	9.51
KB20201000000982091062461009	KB20140418CBEC76	batch8-2020	B1	144	0	3	data5	data4	data3	data1	data3	1.128426	5.4
KB20201000000982091062461832	KB20140418CBBF39	batch6-2020	B2	167	1	10	data5	data3	data1	data2	data3	1.6533	7.74
KB20201000000982091062460371	KB20140418CBEC76	batch8-2020	B2	143	0	2	data4	data2	data2	data2	data3	1.062239	4.12
KB20201000000982091062463549	KB20140418CC5321	batch8-2020	B2	146	0	5	data5	data3	data2	data4	data3	1.011662	4.26
KB20201000000982091062463512	KB20140418CC5321	batch8-2020	B1	146	0	4	data4	data3	data3	data5	data3	1.097901	4.3
KB20201000000982091062461933	KB20140418CBBF39	batch6-2020	B2	167	0	3	data3	data2	data5	data2	data3	1.471568	6.2
KB20201000000982091062466861	KB20140418C843C2	batch9-2020	B1	137	1	9	data4	data2	data3	data1	data3	1.674892	7.38
KB20201000000982091062463555	KB20140418CC4920	batch8-2020	B2	146	0	3	data4	data5	data4	data1	data3	0.979725	3.61
KB20201000000982091062461082	KB20140418CC649D	batch8-2020	B2	146	0	8	data4	data1	data4	data1	data3	1.346162	9.05
KB20201000000982091062461420	KB20140418CC1429	batch6-2020	B2	167	1	8	data5	data2	data4	data3	data3	1.779003	7.56
KB20201000000982091062466870	HOANG0416D8E452	batch9-2020	B2	137	0	8	data5	data3	data4	data3	data3	1.067066	6.99
KB20201000000982091062461446	KB20140418CC1429	batch6-2020	B2	167	1	8	data3	data2	data5	data5	data3	1.779003	7.56
KB20201000000968000010980831	HOANG0416D8E452	batch9-2020	B2	137	0	3	data5	data5	data5	data5	data3	0.997161	4.06
KB20201000000982091062464306	KB20140418CBC22D	batch8-2020	B2	147	0	3	data1	data5	data4	data2	data3	1.444588	8.72
KB20201000000982091062463561	KB20140418CC4920	batch8-2020	B2	146	0	3	data4	data4	data5	data5	data3	1.029333	3.97
KB20201000000982091062463453	KB20140418CBF160	batch8-2020	B1	146	0	5	data3	data5	data4	data3	data3	1.198672	6.11
KB20201000000982091062463476	KB20140418CBF160	batch8-2020	B2	146	0	5	data1	data4	data4	data4	data3	1.065631	4.92
KB20201000000968000010980953	KB20140418CBDD69	batch9-2020	B1	138	0	7	data1	data2	data4	data2	data3	1.100626	6.41
KB20201000000968000010979200	KB20140418CC3691	batch10-2020	B2	127	0	3	data1	data2	data2	data3	data3	1.405012	7.7
KB20201000000982091062460477	KB20140418CC0EFF	batch8-2020	B2	143	0	2	data5	data2	data2	data4	data3	1.097385	4.39
KB20201000000982091062460591	KB20140418CC0EFF	batch8-2020	B1	143	0	5	data2	data1	data2	data3	data3	1.050552	5.44
KB20201000000982091062464971	KB20140418CC649D	batch8-2020	B2	144	1	8	data5	data1	data5	data4	data3	1.585948	7.75
KB20201000000982091062461448	KB20140418CBD0E4	batch6-2020	B1	167	0	7	data4	data1	data3	data4	data3	1.256398	6.64
KB20201000000982091062464560	KB20140418CC33B1	batch8-2020	B1	147	0	6	data1	data4	data4	data2	data3	1.19126	7.29
KB20201000000982091062466960	HOANG0416D8E452	batch9-2020	B1	137	0	8	data3	data1	data4	data3	data3	1.15305	7.81
KB20201000000982091062466639	KB20140418CC30EE	batch10-2020	B1	125	0	6	data3	data1	data3	data2	data3	1.327259	7.68
KB20201000000982091062464309	KB20140418CBC22D	batch8-2020	B2	147	1	18	data4	data4	data1	data5	data3	1.645914	11.83
KB20201000000982091062466872	KB20140418C843C2	batch9-2020	B1	137	1	8	data3	data4	data2	data5	data3	1.778909	7.82
KB20201000000982091062464493	KB20140418CC33B1	batch8-2020	B1	147	0	8	data3	data4	data2	data1	data3	1.283563	7.82
KB20201000000982091062464840	KB20140418CBEC76	batch8-2020	B1	144	0	7	data1	data2	data1	data4	data3	1.072541	5.62
KB20201000000982091062465996	KB20140418C81B1F	batch10-2020	B2	125	0	4	data1	data1	data4	data2	data3	1.581691	9.69
KB20201000000982091062461917	KB20140418CBBF39	batch6-2020	B1	167	1	9	data2	data4	data4	data1	data3	1.716279	7.9
KB20201000000982091062461890	KB20140418CBBF39	batch6-2020	B2	167	1	9	data1	data3	data4	data2	data3	1.64575	7.3
KB20201000000982091062460301	KB20140418CBD457	batch8-2020	B2	143	0	2	data3	data3	data1	data2	data3	1.156573	4.4
KB20201000000982091062461802	KB20140418CC0F54	batch6-2020	B2	167	0	4	data3	data3	data4	data2	data3	1.445565	6.33
KB20201000000982091062463558	KB20140418CC5321	batch8-2020	B2	146	0	4	data4	data4	data1	data5	data3	1.138797	4.61
KB20201000000982091062464888	KB20140418CC262B	batch8-2020	B1	144	0	8	data2	data4	data1	data1	data3	1.114304	6.37
KB20201000000982091062464890	KB20140418CBEC76	batch8-2020	B1	144	0	4	data1	data4	data2	data3	data3	1.09587	4.59
KB20201000000982091062460430	KB20140418CBEC76	batch8-2020	B1	143	0	8	data2	data3	data3	data5	data3	1.066294	6.1
KB20201000000968000010980771	HOANG0416D8E452	batch9-2020	B2	137	0	6	data1	data3	data1	data2	data3	1.036343	5.11
KB20201000000982091062461454	KB20140418CBD0E4	batch6-2020	B1	167	0	6	data3	data4	data1	data3	data3	1.17976	5.86
KB20201000000982091062463218	KB20140418C80A5C	batch8-2020	B2	144	0	3	data2	data3	data4	data5	data3	1.266561	5.46
KB20201000000982091062460269	KB20140418CC38B1	batch6-2020	B2	167	0	4	data5	data4	data5	data1	data3	1.260701	6.12
KB20201000000982091062460474	KB20140418CC0EFF	batch8-2020	B1	143	0	8	data1	data4	data1	data3	data3	1.101166	6.29
KB20201000000982091062461929	KB20140418CBBF39	batch6-2020	B2	167	1	9	data4	data5	data3	data1	data3	1.712967	8.15
KB20201000000982091062466174	KB20140418CBE553	batch10-2020	B1	124	0	5	data4	data4	data3	data3	data3	1.282602	7.74
KB20201000000982091062461023	KB20140418CC649D	batch8-2020	B2	146	1	18	data5	data2	data3	data3	data3	1.743464	11.8
KB20201000000982091062460187	KB20140418CC38B1	batch6-2020	B2	167	1	8	data5	data5	data5	data1	data3	1.593219	6.97
KB20201000000982091062464779	KB20140418CC4920	batch8-2020	B1	147	0	5	data3	data1	data1	data3	data3	1.10075	4.97
KB20201000000982091062464324	KB20140418CBC22D	batch8-2020	B1	147	1	9	data2	data4	data4	data5	data3	1.628689	8.58
KB20201000000982091062464880	KB20140418CBEC76	batch8-2020	B1	144	0	5	data1	data1	data3	data4	data3	1.118559	5.37
KB20201000000968000010980808	HOANG0416D8E452	batch9-2020	B1	137	0	2	data4	data4	data2	data2	data3	1.039122	4.28
KB20201000000982091062464013	KB20140417BC10FB	batch10-2020	B1	126	1	9	data2	data3	data5	data5	data3	1.565259	7.4
KB20201000000968000010981154	KB20140418CBDD69	batch9-2020	B2	138	0	3	data4	data3	data3	data5	data3	0.935936	4.34
KB20201000000982091062464079	KB20140418CBE9A0	batch10-2020	B1	126	1	8	data3	data1	data1	data1	data3	1.839668	7.82
KB20201000000982091062460778	TT20150418F809FD	batch8-2020	B1	143	0	8	data4	data4	data5	data2	data3	1.016252	6.68
KB20201000000982091062463658	TT201504179BD8C9	batch10-2020	B1	126	0	3	data4	data2	data2	data5	data3	1.239378	6.02
KB20201000000982091062462214	KB20140418CBE76D	batch8-2020	B2	147	0	4	data5	data5	data1	data4	data3	1.43047	8.4
KB20201000000982091062461455	KB20140418CBD0E4	batch6-2020	B1	167	1	8	data2	data5	data1	data3	data3	1.502047	6.43
KB20201000000982091062464931	KB20140418CBF160	batch8-2020	B2	144	0	2	data1	data3	data4	data4	data3	1.227154	5.39
KB20201000000982091062464012	KB20140418CBE9A0	batch10-2020	B1	126	1	8	data4	data2	data2	data5	data3	1.780506	8.32
KB20201000000982091062464512	KB20140418CC33B1	batch8-2020	B1	147	0	8	data1	data5	data3	data4	data3	1.20913	7.87
KB20201000000982091062463448	KB20140418CBF160	batch8-2020	B2	146	0	4	data3	data4	data1	data1	data3	1.098585	4.63
KB20201000000982091062460899	KB20140418CC4D91	batch8-2020	B1	144	0	6	data4	data3	data1	data2	data3	1.057859	4.66
KB20201000000982091062461476	KB20140418CBD0E4	batch6-2020	B2	167	0	2	data2	data4	data3	data1	data3	1.219527	5.1
KB20201000000982091062463523	KB20140418CC5321	batch8-2020	B2	146	0	2	data2	data3	data5	data5	data3	1.08715	3.49
KB20201000000968000010979360	KB20140418C81B1F	batch10-2020	B2	127	1	11	data1	data5	data3	data5	data3	1.752702	11.12
KB20201000000982091062460442	KB20140418CC0EFF	batch8-2020	B1	143	0	7	data3	data1	data4	data2	data3	1.049258	6.22
KB20201000000968000010981585	HOANG0416D8E452	batch9-2020	B1	137	0	2	data1	data1	data1	data5	data3	1.102114	5.07
KB20201000000982091062461399	KB20140418CBD0E4	batch6-2020	B2	167	0	2	data5	data4	data3	data3	data3	1.20339	4.42
KB20201000000982091062463559	KB20140418CC649D	batch8-2020	B2	146	1	17	data3	data4	data5	data4	data3	1.670198	11.8
KB20201000000982091062463553	KB20140418CC5321	batch8-2020	B2	146	0	3	data5	data4	data5	data1	data3	1.086647	4.24
KB20201000000982091062466152	KB20140418CBE553	batch10-2020	B1	124	1	12	data3	data2	data5	data1	data3	1.605587	10.52
KB20201000000982091062461811	KB20140418CC0F54	batch6-2020	B2	167	1	9	data3	data5	data4	data4	data3	1.662461	7.81
KB20201000000982091062464391	KB20140418CBE76D	batch8-2020	B2	147	1	17	data4	data1	data2	data5	data3	1.665907	12.49
KB20201000000982091062460304	KB20140418CBEC76	batch8-2020	B2	143	0	2	data2	data1	data4	data1	data3	1.028117	3.56
KB20201000000982091062466640	KB20140418CC30EE	batch10-2020	B1	125	1	10	data3	data4	data4	data3	data3	1.756212	9.21
KB20201000000982091062460535	KB20140418CBE76D	batch8-2020	B1	146	1	9	data5	data5	data5	data2	data3	1.955957	10.62
KB20201000000982091062463285	KB20140418C80A5C	batch8-2020	B2	144	0	2	data3	data4	data5	data4	data3	1.318192	4.94
KB20201000000982091062464984	KB20140418CC649D	batch8-2020	B1	144	1	13	data2	data5	data5	data4	data3	1.609736	9.11
KB20201000000982091062464980	KB20140418CBF160	batch8-2020	B1	144	0	6	data5	data2	data3	data1	data3	1.250223	5.59
KB20201000000982091062466934	KB20140418CBDD50	batch9-2020	B2	137	0	8	data3	data5	data1	data5	data3	0.996253	6.1
KB20201000000982091062464906	KB20140418CBF160	batch8-2020	B1	144	0	3	data3	data5	data2	data1	data3	1.331396	5.59
KB20201000000982091062460422	KB20140418CC0EFF	batch8-2020	B1	143	0	8	data2	data2	data2	data1	data3	1.041885	6.23
KB20201000000982091062465015	KB20140418CC262B	batch8-2020	B1	144	1	8	data2	data1	data2	data1	data3	1.290125	6.08
KB20201000000982091062461821	KB20140418CBBF39	batch6-2020	B2	167	1	9	data5	data4	data2	data5	data3	1.600296	7.61
KB20201000000982091062460229	KB20140418CC38B1	batch6-2020	B2	167	0	3	data3	data1	data5	data5	data4	1.291163	5.17
KB20201000000982091062461798	KB20140418CC0F54	batch6-2020	B2	167	0	8	data3	data3	data4	data3	data4	1.374043	7.76
KB20201000000982091062460488	KB20140418CC0EFF	batch8-2020	B1	143	0	8	data5	data2	data4	data1	data4	0.979373	6.21
KB20201000000982091062466840	KB20140418C843C2	batch9-2020	B1	137	0	8	data2	data3	data4	data4	data4	1.20782	7.81
KB20201000000982091062464051	KB20140418CBE9A0	batch10-2020	B1	126	1	8	data5	data4	data1	data5	data4	1.847766	7.98
KB20201000000982091062466810	KB20140418C843C2	batch9-2020	B1	137	1	8	data1	data3	data5	data1	data4	1.719983	7.4
KB20201000000982091062460331	KB20140418CBD457	batch8-2020	B1	143	1	8	data5	data5	data4	data3	data4	1.636809	6.85
KB20201000000982091062460375	KB20140418CBD457	batch8-2020	B2	143	0	2	data2	data3	data3	data4	data4	1.171055	4.52
KB20201000000982091062464758	KB20140418CC4920	batch8-2020	B2	147	0	3	data2	data5	data1	data5	data4	1.10163	4.61
KB20201000000982091062464871	KB20140418CC262B	batch8-2020	B1	144	0	8	data5	data3	data3	data2	data4	0.945973	6.18
KB20201000000982091062460426	KB20140418CC0EFF	batch8-2020	B1	143	0	7	data4	data4	data3	data5	data4	1.095415	5.62
KB20201000000982091062463619	TT201504179BD8C9	batch10-2020	B2	126	0	7	data1	data2	data1	data5	data4	0.908776	5.56
KB20201000000982091062464360	KB20140418CBC22D	batch8-2020	B1	147	0	8	data2	data5	data1	data5	data4	1.472981	9.5
KB20201000000982091062461893	KB20140418CBBF39	batch6-2020	B2	167	0	8	data3	data5	data4	data4	data4	1.458466	8.25
KB20201000000982091062466879	HOANG0416D8E452	batch9-2020	B2	137	0	8	data3	data2	data5	data5	data4	1.137771	7.31
KB20201000000982091062460347	KB20140418CBD457	batch8-2020	B2	143	0	2	data5	data3	data1	data3	data4	1.228695	4.73
KB20201000000982091062462073	KB20140418CC33B1	batch8-2020	B1	142	0	5	data3	data3	data5	data3	data4	1.058871	4.99
KB20201000000982091062463213	KB20140418C80A5C	batch8-2020	B2	144	0	3	data5	data5	data4	data1	data4	1.3231	6.75
KB20201000000982091062464204	TT20150416D53D84	batch8-2020	B1	147	1	18	data1	data5	data5	data3	data4	1.75859	13.91
KB20201000000982091062460765	TT20150418F809FD	batch8-2020	B1	143	0	5	data3	data3	data3	data5	data4	1.029057	4.87
KB20201000000982091062464562	KB20140418CC33B1	batch8-2020	B2	147	1	9	data3	data3	data5	data1	data4	1.316649	6.95
KB20201000000982091062462446	KB20140418CBE76D	batch8-2020	B2	147	0	7	data5	data3	data3	data3	data4	1.270132	7.44
KB20201000000982091062462365	KB20140418CBE76D	batch8-2020	B2	147	1	17	data4	data2	data2	data4	data4	1.528785	11.85
KB20201000000982091062461429	KB20140418CC1429	batch6-2020	B2	167	0	8	data3	data2	data3	data4	data4	1.490708	7.56
KB20201000000968000010981178	KB20140418CBDD69	batch9-2020	B2	138	0	4	data4	data4	data2	data3	data4	1.044063	5.21
KB20201000000982091062463668	TT201504179BD8C9	batch10-2020	B1	126	0	4	data4	data2	data3	data2	data4	1.076665	5.43
KB20201000000982091062464539	KB20140418CC33B1	batch8-2020	B2	147	0	4	data3	data3	data2	data1	data4	1.246425	6.17
KB20201000000968000010979607	KB20140418CC3691	batch10-2020	B1	127	1	10	data1	data4	data3	data3	data4	1.615165	8.96
KB20201000000982091062464336	KB20140418CBC22D	batch8-2020	B1	147	1	12	data2	data2	data4	data3	data4	1.67262	10.43
KB20201000000982091062461840	KB20140418CC0F54	batch6-2020	B1	167	1	11	data4	data2	data3	data2	data4	1.845854	9.06
KB20201000000982091062461880	KB20140418CC0F54	batch6-2020	B1	167	1	10	data1	data1	data2	data3	data4	1.828442	8.89
KB20201000000982091062461427	KB20140418CBD0E4	batch6-2020	B1	167	0	5	data4	data2	data1	data2	data4	1.286169	6.29
KB20201000000982091062463537	KB20140418CC5321	batch8-2020	B1	146	0	5	data4	data5	data4	data2	data4	1.11607	4.42
KB20201000000982091062460553	KB20140418CBE76D	batch8-2020	B2	146	1	12	data5	data5	data5	data5	data4	1.812224	10.01
KB20201000000982091062466631	KB20140418CC30EE	batch10-2020	B1	125	1	9	data3	data3	data1	data2	data4	1.770675	9.13
KB20201000000982091062464799	KB20140418CC262B	batch8-2020	B2	144	0	5	data4	data5	data4	data5	data4	0.968014	5.62
KB20201000000982091062460677	TT20150418F809FD	batch8-2020	B2	143	0	2	data1	data3	data5	data2	data4	1.002748	4.46
KB20201000000982091062463252	KB20140418C80A5C	batch8-2020	B2	144	1	8	data5	data3	data5	data3	data4	1.458106	6.38
KB20201000000982091062460131	KB20140418CC33B1	batch8-2020	B1	142	0	8	data1	data3	data5	data4	data4	1.07367	5.76
KB20201000000982091062464516	TT20150416D53D84	batch8-2020	B2	147	1	18	data3	data3	data3	data3	data4	1.704763	13.58
KB20201000000982091062461823	KB20140418CBBF39	batch6-2020	B2	167	0	2	data3	data5	data4	data4	data4	1.283688	4.63
KB20201000000982091062460435	KB20140418CBEC76	batch8-2020	B1	143	0	8	data3	data3	data4	data3	data4	1.066294	6.1
KB20201000000982091062463590	KB20140418CC5321	batch8-2020	B1	146	0	4	data1	data4	data1	data2	data4	1.099031	4.22
KB20201000000982091062460737	TT20150418F809FD	batch8-2020	B1	143	0	8	data4	data5	data2	data3	data4	0.958895	5.57
KB20201000000982091062464865	KB20140418CC262B	batch8-2020	B1	144	0	7	data5	data5	data4	data1	data4	1.0533	6.6
KB20201000000982091062464905	KB20140418CC649D	batch8-2020	B2	144	0	7	data2	data1	data2	data2	data4	1.164803	7.06
KB20201000000982091062466037	KB20140418C81B1F	batch10-2020	B2	125	1	20	data4	data4	data4	data2	data4	1.74756	14
KB20201000000982091062461966	KB20140418CBBF39	batch6-2020	B2	167	1	9	data4	data3	data4	data3	data4	1.737618	7.9
KB20201000000982091062464014	KB20140418CBE9A0	batch10-2020	B1	126	1	8	data4	data5	data2	data2	data4	1.837504	8.34
KB20201000000982091062464518	KB20140418CC33B1	batch8-2020	B1	147	1	8	data1	data1	data1	data2	data4	1.32072	6.4
KB20201000000982091062461865	KB20140418CC0F54	batch6-2020	B1	167	1	9	data5	data2	data5	data3	data4	1.773448	8.31
KB20201000000982091062461792	KB20140418CC0F54	batch6-2020	B2	167	1	9	data1	data4	data1	data1	data4	1.717715	8.12
KB20201000000982091062464900	KB20140418CC649D	batch8-2020	B1	144	1	9	data1	data4	data4	data5	data4	1.641629	8.44
KB20201000000982091062460757	TT20150418F809FD	batch8-2020	B1	143	0	5	data1	data5	data2	data3	data4	1.074032	5.28
KB20201000000968000010981273	HOANG0416D8E452	batch9-2020	B1	137	0	3	data4	data2	data1	data4	data4	0.979297	3.97
KB20201000000982091062463258	KB20140418C80A5C	batch8-2020	B2	144	1	8	data1	data2	data1	data4	data4	1.586117	6.64
KB20201000000982091062463678	KB20140417BC10FB	batch10-2020	B1	126	0	4	data2	data3	data2	data3	data4	1.265841	6.3
KB20201000000982091062463309	KB20140418CC4920	batch8-2020	B2	146	0	4	data2	data5	data4	data3	data4	1.093208	4.68
KB20201000000982091062461853	KB20140418CC0F54	batch6-2020	B1	167	1	10	data4	data3	data5	data1	data4	1.773448	8.61
KB20201000000982091062465022	KB20140418CC262B	batch8-2020	B1	144	0	8	data1	data3	data4	data5	data4	1.093215	6.22
KB20201000000982091062466156	KB20140418CBE553	batch10-2020	B2	124	1	16	data2	data3	data3	data3	data4	1.701534	12.83
KB20201000000982091062463639	KB20140417BC10FB	batch10-2020	B1	126	0	7	data2	data1	data1	data3	data4	1.206203	7.48
KB20201000000982091062466851	HOANG0416D8E452	batch9-2020	B2	137	0	5	data4	data1	data4	data3	data4	1.014973	5.89
KB20201000000982091062463506	KB20140418CC5321	batch8-2020	B2	146	0	3	data4	data4	data5	data5	data4	1.019913	3.71
KB20201000000982091062461045	KB20140418CBEC76	batch8-2020	B2	144	0	2	data1	data3	data2	data5	data4	1.062826	4.28
KB20201000000982091062461005	KB20140418CC649D	batch8-2020	B1	146	0	5	data5	data2	data1	data2	data4	1.557166	9.56
KB20201000000968000010979585	KB20140418C81B1F	batch10-2020	B1	127	0	6	data1	data1	data3	data3	data4	1.602142	10.97
KB20201000000982091062460508	KB20140418CBE76D	batch8-2020	B2	146	1	9	data5	data4	data3	data5	data4	1.773704	8.57
KB20201000000982091062460779	TT20150418F809FD	batch8-2020	B1	143	0	2	data3	data1	data3	data3	data4	1.160553	4.65
KB20201000000982091062464595	KB20140418CBE76D	batch8-2020	B2	147	1	18	data5	data1	data3	data5	data4	1.644642	11.88
KB20201000000982091062461957	KB20140418CBBF39	batch6-2020	B2	167	1	9	data2	data2	data5	data3	data4	1.71445	7.74
KB20201000000982091062463267	KB20140418C80A5C	batch8-2020	B2	144	1	9	data1	data2	data4	data4	data4	1.538577	7.32
KB20201000000982091062463543	KB20140418CC649D	batch8-2020	B2	146	1	20	data2	data2	data2	data3	data4	1.605119	11.99
KB20201000000982091062463516	KB20140418CC4920	batch8-2020	B2	146	0	3	data3	data5	data3	data3	data4	0.955589	3.27
KB20201000000982091062464763	KB20140418CC4920	batch8-2020	B2	147	0	5	data3	data4	data1	data4	data4	0.978521	4.68
KB20201000000982091062464529	TT20150416D53D84	batch8-2020	B2	147	1	8	data5	data5	data4	data4	data4	1.61837	9.61
KB20201000000982091062464783	KB20140418CC4920	batch8-2020	B2	147	0	7	data1	data5	data2	data2	data4	1.009881	5.08
KB20201000000982091062460243	KB20140418CC38B1	batch6-2020	B1	167	1	8	data4	data1	data4	data1	data4	1.541733	6.38
KB20201000000968000010981152	HOANG0416D8E452	batch9-2020	B1	137	0	3	data5	data4	data4	data2	data4	1.032101	4.23
KB20201000000982091062462020	KB20140418CC33B1	batch8-2020	B1	142	0	8	data4	data4	data5	data5	data4	0.978399	5.06
KB20201000000982091062464851	KB20140418CBEC76	batch8-2020	B1	144	0	6	data5	data3	data5	data5	data4	1.006872	5.38
KB20201000000982091062463400	KB20140418CBF160	batch8-2020	B1	146	0	5	data4	data3	data3	data4	data4	1.17301	4.46
KB20201000000982091062465020	KB20140418CC262B	batch8-2020	B2	144	0	2	data2	data4	data2	data1	data4	1.037139	4.49
KB20201000000982091062466896	HOANG0416D8E452	batch9-2020	B1	137	0	7	data5	data4	data5	data5	data4	1.147961	7.03
KB20201000000968000010981591	KB20140418CBDD69	batch9-2020	B2	138	0	5	data5	data1	data2	data2	data4	1.068311	5.63
KB20201000000982091062466949	KB20140418CBDD50	batch9-2020	B2	137	0	5	data5	data1	data5	data5	data4	0.953161	4.68
KB20201000000982091062466102	KB20140418CBE553	batch10-2020	B2	124	1	18	data1	data3	data2	data4	data4	1.78863	13.34
KB20201000000982091062464543	KB20140418CC33B1	batch8-2020	B2	147	0	6	data1	data3	data5	data2	data4	1.033642	5.92
KB20201000000982091062466954	HOANG0416D8E452	batch9-2020	B1	137	0	5	data2	data1	data3	data3	data4	1.119645	6.09
KB20201000000982091062461831	KB20140418CC0F54	batch6-2020	B2	167	0	5	data3	data5	data5	data4	data4	1.42942	6.92
KB20201000000982091062466967	KB20140418CBDD50	batch9-2020	B2	137	0	8	data1	data2	data4	data1	data4	1.021845	6.55
KB20201000000982091062465068	KB20140418CC262B	batch8-2020	B2	144	0	5	data2	data3	data3	data1	data4	1.027223	5.02
KB20201000000982091062461443	KB20140418CC1429	batch6-2020	B1	167	1	8	data5	data1	data5	data4	data4	1.834736	7.75
KB20201000000982091062460522	KB20140418CBE76D	batch8-2020	B1	146	0	4	data4	data2	data3	data4	data4	1.52379	6.83
KB20201000000982091062466846	KB20140418C843C2	batch9-2020	B1	137	1	8	data2	data1	data1	data5	data4	1.719983	7.4
KB20201000000982091062460571	KB20140418CBE76D	batch8-2020	B2	146	1	17	data2	data4	data3	data2	data4	1.687726	10.27
KB20201000000982091062466798	KB20140418C843C2	batch9-2020	B1	137	1	8	data4	data2	data5	data4	data4	1.719983	7.4
KB20201000000982091062464944	KB20140418CBF160	batch8-2020	B1	144	1	8	data1	data1	data5	data3	data4	1.485988	6.41
KB20201000000968000010978933	KB20140418CC3691	batch10-2020	B1	127	1	14	data4	data1	data5	data4	data5	1.670303	10.21
KB20201000000982091062464956	KB20140418CC649D	batch8-2020	B2	144	1	9	data3	data4	data2	data1	data5	1.538901	8.48
KB20201000000982091062466105	KB20140418CBE553	batch10-2020	B1	124	0	6	data4	data4	data5	data1	data5	1.353214	8.89
KB20201000000982091062464022	KB20140417BC10FB	batch10-2020	B1	126	0	4	data3	data5	data4	data3	data5	1.259441	6.47
KB20201000000982091062463513	KB20140418CC4920	batch8-2020	B2	146	0	5	data3	data5	data3	data2	data5	1.075915	4.11
KB20201000000982091062464648	KB20140418CBE76D	batch8-2020	B1	147	1	8	data2	data1	data4	data1	data5	1.554287	7.05
KB20201000000982091062464855	KB20140418CC262B	batch8-2020	B1	144	0	8	data3	data3	data4	data4	data5	1.053159	6.72
KB20201000000982091062461392	KB20140418CC1429	batch6-2020	B1	167	0	6	data2	data4	data2	data5	data5	1.546441	7.15
KB20201000000968000010981090	KB20140418CBDD50	batch9-2020	B1	137	0	6	data2	data1	data3	data3	data5	1.013406	5.85
KB20201000000968000010981040	KB20140418CBDD50	batch9-2020	B1	137	0	3	data2	data4	data5	data5	data5	1.094741	4.81
KB20201000000982091062466925	KB20140418CBDD50	batch9-2020	B1	137	0	4	data5	data2	data5	data4	data5	1.00065	4.96
KB20201000000968000010979287	KB20140418CC3691	batch10-2020	B2	127	1	12	data5	data3	data5	data2	data5	1.710391	10.31
KB20201000000982091062461073	KB20140418CBEC76	batch8-2020	B2	144	0	2	data1	data4	data1	data1	data5	1.062826	4.28
KB20201000000982091062464909	KB20140418CBF160	batch8-2020	B1	144	0	8	data5	data3	data1	data4	data5	1.181159	6.47
KB20201000000982091062466880	KB20140418C843C2	batch9-2020	B2	137	1	9	data2	data1	data3	data1	data5	1.607706	7.32
KB20201000000982091062466871	KB20140418C843C2	batch9-2020	B2	137	0	8	data4	data3	data3	data2	data5	1.375955	7.21
KB20201000000982091062463680	TT201504179BD8C9	batch10-2020	B1	126	0	5	data4	data2	data2	data5	data5	1.115058	6.24
KB20201000000982091062461854	KB20140418CC0F54	batch6-2020	B2	167	1	8	data2	data5	data3	data5	data5	1.670061	7.62
KB20201000000982091062466151	KB20140418CBE553	batch10-2020	B1	124	0	5	data1	data1	data2	data1	data5	1.420739	9
KB20201000000982091062464278	TT20150416D53D84	batch8-2020	B1	147	0	5	data1	data5	data3	data3	data5	1.46137	9.9
KB20201000000982091062461083	KB20140418CC649D	batch8-2020	B1	146	1	9	data1	data2	data4	data5	data5	1.632801	10.25
KB20201000000982091062460634	KB20140418CC0EFF	batch8-2020	B1	143	0	4	data4	data1	data1	data2	data5	1.097844	5.18
KB20201000000982091062460227	KB20140418CC38B1	batch6-2020	B2	167	0	6	data2	data1	data1	data1	data5	1.441086	7.15
KB20201000000982091062464925	KB20140418CC649D	batch8-2020	B2	144	0	4	data2	data5	data5	data5	data5	1.301009	6.76
KB20201000000968000010980670	HOANG0416D8E452	batch9-2020	B1	137	0	5	data3	data1	data3	data2	data5	0.959706	4.43
KB20201000000982091062466010	KB20140418C81B1F	batch10-2020	B1	125	1	9	data5	data4	data2	data3	data5	1.750156	10.39
KB20201000000968000010978680	KB20140418C81B1F	batch10-2020	B2	127	1	18	data3	data5	data5	data5	data5	1.847038	13.51
KB20201000000982091062464657	KB20140418CBE76D	batch8-2020	B1	147	0	8	data4	data3	data5	data5	data5	1.404946	9.96
KB20201000000982091062460455	KB20140418CBEC76	batch8-2020	B1	143	0	4	data1	data4	data4	data2	data5	1.066294	4.9
KB20201000000982091062460997	KB20140418CBEC76	batch8-2020	B1	144	1	9	data2	data1	data5	data5	data5	1.534707	7.09
KB20201000000982091062466627	KB20140418CC30EE	batch10-2020	B2	125	1	16	data4	data1	data2	data2	data5	1.65691	11.46
KB20201000000982091062463275	KB20140418C80A5C	batch8-2020	B2	144	0	8	data3	data4	data2	data1	data5	1.217353	6.6
KB20201000000982091062460514	KB20140418CBE76D	batch8-2020	B1	146	1	9	data2	data2	data5	data1	data5	1.779828	8.79
KB20201000000968000010979201	KB20140418C81B1F	batch10-2020	B2	127	0	5	data4	data5	data4	data1	data5	1.539837	10.12
KB20201000000968000010981609	HOANG0416D8E452	batch9-2020	B1	137	0	3	data5	data4	data3	data1	data5	1.04302	4.41
KB20201000000982091062466656	KB20140418CC30EE	batch10-2020	B2	125	0	5	data3	data4	data2	data3	data5	1.41722	7.56
KB20201000000968000010981329	KB20140418CBDD69	batch9-2020	B2	138	0	8	data5	data1	data1	data4	data5	1.003898	5.87
KB20201000000982091062463424	KB20140418CBF160	batch8-2020	B2	146	0	2	data5	data2	data4	data1	data5	1.038993	4.7
KB20201000000982091062466842	HOANG0416D8E452	batch9-2020	B2	137	0	2	data5	data2	data3	data2	data5	0.995924	3.73
KB20201000000982091062467065	KB20140418CC4920	batch8-2020	B1	149	0	5	data2	data3	data2	data3	data5	1.110873	5.13
KB20201000000982091062461799	KB20140418CC0F54	batch6-2020	B1	167	1	10	data3	data2	data3	data1	data5	1.773448	8.61
KB20201000000982091062463671	TT201504179BD8C9	batch10-2020	B1	126	0	6	data5	data3	data2	data2	data5	1.101902	6.51
KB20201000000982091062463451	KB20140418CBF160	batch8-2020	B1	146	0	4	data4	data5	data2	data2	data5	1.128704	4.74
KB20201000000982091062463876	KB20140418CBE9A0	batch10-2020	B1	126	1	8	data1	data1	data1	data2	data5	1.795664	8.11
KB20201000000982091062460378	KB20140418CBEC76	batch8-2020	B2	143	0	2	data2	data5	data1	data2	data5	1.010561	4.11
KB20201000000982091062464830	KB20140418CC262B	batch8-2020	B2	144	0	5	data4	data5	data5	data3	data5	1.033338	6.18
KB20201000000982091062460397	KB20140418CBEC76	batch8-2020	B1	143	0	8	data5	data4	data4	data4	data5	1.066294	6.1
KB20201000000982091062465064	KB20140418CC262B	batch8-2020	B1	144	0	7	data1	data1	data2	data1	data5	1.094989	5.86
KB20201000000982091062464198	TT20150416D53D84	batch8-2020	B1	147	1	16	data5	data4	data4	data3	data5	1.649037	11.76
KB20201000000968000010978753	KB20140418CC3691	batch10-2020	B1	127	0	3	data1	data2	data3	data2	data5	1.407624	7.07
KB20201000000982091062461075	KB20140418CBEC76	batch8-2020	B1	144	1	8	data5	data1	data5	data5	data5	1.406853	6.27
KB20201000000982091062463644	TT201504179BD8C9	batch10-2020	B1	126	0	3	data2	data3	data3	data5	data5	1.011953	4.85
KB20201000000982091062463653	KB20140417BC10FB	batch10-2020	B1	126	1	9	data5	data5	data4	data1	data5	1.554136	7.8
KB20201000000982091062460385	KB20140418CBEC76	batch8-2020	B2	143	0	2	data2	data2	data1	data4	data5	1.010561	4.11
KB20201000000982091062460919	KB20140418CC4D91	batch8-2020	B1	144	0	2	data3	data2	data5	data4	data5	1.007833	3.29
KB20201000000982091062466843	KB20140418C843C2	batch9-2020	B1	137	1	8	data5	data2	data5	data4	data5	1.721241	7.97
KB20201000000982091062464824	KB20140418CC262B	batch8-2020	B2	144	0	5	data2	data5	data3	data4	data5	1.017861	5.85
KB20201000000982091062464734	KB20140418CC4920	batch8-2020	B2	147	0	3	data1	data4	data5	data2	data5	1.001004	4.54
KB20201000000982091062463581	KB20140418CC5321	batch8-2020	B2	146	0	3	data3	data5	data3	data4	data5	1.072155	4.38
KB20201000000982091062464997	KB20140418CC262B	batch8-2020	B2	144	0	2	data2	data4	data4	data4	data5	1.021163	4.18
KB20201000000982091062464811	KB20140418CBEC76	batch8-2020	B1	144	0	8	data3	data2	data1	data4	data5	1.118559	6.27
KB20201000000982091062460908	KB20140418CC4D91	batch8-2020	B1	144	0	4	data5	data3	data1	data5	data5	1.003198	4.34
KB20201000000982091062460562	KB20140418CBE76D	batch8-2020	B1	146	1	8	data1	data1	data1	data2	data5	1.78774	7.95
KB20201000000982091062460470	KB20140418CC0EFF	batch8-2020	B1	143	0	5	data2	data1	data4	data4	data5	1.091423	5.25
KB20201000000982091062463524	KB20140418CC4920	batch8-2020	B2	146	0	2	data3	data4	data3	data1	data5	0.958314	3.05
KB20201000000982091062460733	TT20150418F809FD	batch8-2020	B1	143	0	8	data5	data4	data3	data3	data5	1.022153	6.79
KB20201000000982091062461988	KB20140418CBBF39	batch6-2020	B2	167	0	6	data1	data5	data1	data1	data5	1.42654	6.69
KB20201000000982091062460104	KB20140418CC33B1	batch8-2020	B1	142	0	2	data3	data3	data2	data5	data5	1.048612	4.15
KB20201000000982091062461069	KB20140418CBEC76	batch8-2020	B1	144	0	5	data4	data1	data4	data4	data5	1.07993	5.01
KB20201000000982091062463381	KB20140418CC4920	batch8-2020	B1	146	0	3	data5	data2	data2	data4	data5	1.05542	3.84
KB20201000000982091062461445	KB20140418CBD0E4	batch6-2020	B1	167	0	7	data3	data2	data1	data5	data5	1.206681	6.5
KB20201000000968000010979158	KB20140418CC3691	batch10-2020	B1	127	1	10	data3	data3	data1	data4	data5	1.689199	9.39
KB20201000000982091062466162	KB20140418CBE553	batch10-2020	B2	124	1	15	data2	data2	data3	data1	data5	1.69277	11.28
KB20201000000982091062463569	KB20140418CC5321	batch8-2020	B2	146	0	3	data3	data1	data2	data3	data5	1.077669	4.32
KB20201000000982091062464990	KB20140418CBF160	batch8-2020	B1	144	1	9	data3	data5	data4	data5	data5	1.553126	7.24
KB20201000000982091062461898	KB20140418CBBF39	batch6-2020	B2	167	1	8	data1	data1	data2	data4	data5	1.666628	7.21
KB20201000000968000010979488	KB20140418CBE553	batch10-2020	B2	127	0	3	data3	data2	data3	data2	data5	1.296083	7.1
KB20201000000968000010981507	KB20140418CBDD69	batch9-2020	B1	138	0	2	data4	data1	data2	data2	data5	1.066613	4.46
KB20201000000982091062463507	KB20140418CC4920	batch8-2020	B2	146	0	3	data2	data2	data2	data4	data5	1.032102	3.55
KB20201000000982091062460352	KB20140418CBD457	batch8-2020	B2	143	0	6	data5	data5	data3	data2	data5	1.214665	4.89
KB20201000000968000010981561	HOANG0416D8E452	batch9-2020	B1	137	0	2	data1	data4	data4	data2	data5	1.09595	4.64
KB20201000000982091062460752	TT20150418F809FD	batch8-2020	B1	143	0	3	data1	data1	data2	data2	data5	1.027153	4.73
KB20201000000968000010981587	HOANG0416D8E452	batch9-2020	B2	137	0	8	data5	data2	data5	data2	data5	0.916319	4.98
KB20201000000968000010979438	KB20140418CC3691	batch10-2020	B1	127	0	5	data2	data5	data2	data2	data5	1.501783	8.52
KB20201000000968000010980795	KB20140418CBDD50	batch9-2020	B1	137	0	6	data4	data3	data4	data2	data5	1.035588	5.41
KB20201000000982091062460916	KB20140418CC4D91	batch8-2020	B1	144	0	7	data5	data5	data4	data2	data5	0.982685	5.94
KB20201000000982091062463676	TT201504179BD8C9	batch10-2020	B1	126	0	2	data4	data3	data4	data4	data5	1.053035	4.1
KB20201000000982091062464233	TT20150416D53D84	batch8-2020	B1	147	1	16	data3	data2	data3	data1	data5	1.807475	12.9
KB20201000000982091062460319	KB20140418CBD457	batch8-2020	B2	143	1	8	data3	data3	data2	data5	data5	1.486546	5.8
KB20201000000982091062461464	KB20140418CC1429	batch6-2020	B1	167	1	8	data4	data1	data3	data4	data5	1.834736	7.75
KB20201000000982091062464969	KB20140418CC649D	batch8-2020	B2	144	0	8	data3	data2	data4	data2	data5	1.289469	7.29
KB20201000000982091062460427	KB20140418CC0EFF	batch8-2020	B1	143	0	8	data3	data2	data3	data5	data5	1.197507	6.75
KB20201000000982091062460559	KB20140418CBE76D	batch8-2020	B1	146	1	8	data5	data4	data4	data1	data5	1.816918	9.4
KB20201000000982091062463482	KB20140418CBF160	batch8-2020	B2	146	0	4	data4	data4	data1	data2	data5	0.987175	4.13
KB20201000000982091062466971	KB20140418CBDD50	batch9-2020	B2	137	0	8	data1	data2	data3	data5	data5	0.983887	6.08
KB20201000000982091062466865	HOANG0416D8E452	batch9-2020	B2	137	0	7	data4	data1	data4	data1	data5	0.915938	4.71
KB20201000000982091062466632	KB20140418CC30EE	batch10-2020	B1	125	0	4	data4	data2	data1	data1	data5	1.302087	6.26
KB20201000000982091062461815	KB20140418CBBF39	batch6-2020	B1	167	0	6	data3	data1	data4	data3	data5	1.49919	6.79
